# Supplementary material
Source: PubMed Central journal article supplement (PMC4737991)
Supplement: NIHMS728191-supplement-5.pdf [file NIHMS728191-supplement-5.pdf]

**Supplementary Table S1: Summary of TCGA data.**

| <b>Tumor</b>                          | <b>Abbreviation</b> | <b>Sample size</b> |
|---------------------------------------|---------------------|--------------------|
| Basal-like breast cancer              | Basal               | 103                |
| Bladder urothelial carcinoma          | BLCA                | 88                 |
| Breast invasive carcinoma             | BRCA                | 503                |
| Colon adenocarcinoma                  | COAD                | 89                 |
| Head and neck squamous cell carcinoma | HNSC                | 203                |
| Kidney renal clear cell carcinoma     | KIRC                | 354                |
| Lung adenocarcinoma                   | LUAD                | 131                |
| Lung squamous cell carcinoma          | LUSC                | 104                |
| Ovarian carcinoma                     | OVCA                | 123                |
| Rectum adenocarcinoma                 | READ                | 47                 |
| Uterine corpus endometrial carcinoma  | UCEC                | 189                |

**Supplementary Table S2: Correlation of Pan-Cancer signature genes by tumor type**

|          | E vs M | Basal  | BLCA   | BRCA   | COAD   | HNSC   | KIRC   | LUAD   | LUSC   | OVCA   | READ   | UCEC   |
|----------|--------|--------|--------|--------|--------|--------|--------|--------|--------|--------|--------|--------|
| ADAM12   | M      | 0.812  | 0.816  | 0.814  | 0.858  | 0.821  | 0.779  | 0.778  | 0.659  | 0.842  | 0.824  | 0.581  |
| ADAMTS12 | M      | 0.686  | 0.758  | 0.607  | 0.806  | 0.776  | 0.626  | 0.629  | 0.761  | 0.838  | 0.875  | 0.380  |
| ADAMTS2  | M      | 0.758  | 0.784  | 0.773  | 0.827  | 0.834  | 0.634  | 0.615  | 0.810  | 0.817  | 0.872  | 0.625  |
| AEBP1    | M      | 0.817  | 0.822  | 0.822  | 0.820  | 0.845  | 0.640  | 0.636  | 0.858  | 0.844  | 0.910  | 0.831  |
| ANGPTL2  | M      | 0.761  | 0.784  | 0.848  | 0.884  | 0.754  | 0.393  | 0.769  | 0.847  | 0.787  | 0.932  | 0.633  |
| ANTXR1   | M      | 0.702  | 0.816  | 0.785  | 0.782  | 0.710  | 0.621  | 0.639  | 0.771  | 0.733  | 0.879  | 0.595  |
| AP1G1    | E      | -0.056 | -0.330 | -0.343 | -0.002 | -0.179 | -0.523 | -0.394 | -0.135 | -0.181 | -0.625 | -0.525 |
| ATP8B1   | E      | -0.055 | -0.547 | -0.351 | -0.136 | -0.363 | 0.466  | -0.409 | -0.469 | -0.090 | -0.397 | -0.490 |
| AXL      | M      | 0.698  | 0.782  | 0.813  | 0.835  | 0.674  | 0.528  | 0.624  | 0.656  | 0.542  | 0.954  | 0.604  |
| BNC2     | M      | 0.805  | 0.798  | 0.813  | 0.709  | 0.813  | 0.202  | 0.756  | 0.831  | 0.249  | 0.799  | 0.519  |
| CALD1    | M      | 0.536  | 0.799  | 0.780  | 0.663  | 0.813  | 0.499  | 0.748  | 0.826  | 0.625  | 0.779  | 0.597  |
| CDH1     | E      | -0.196 | -0.440 | -0.407 | -0.379 | -0.462 | -0.518 | -0.367 | -0.317 | -0.317 | -0.405 | -0.539 |
| CDH2     | M      | 0.507  | 0.685  | 0.490  | 0.734  | 0.705  | -0.224 | 0.560  | 0.492  | 0.030  | 0.793  | 0.501  |
| CDS1     | E      | -0.151 | -0.360 | -0.422 | -0.384 | -0.413 | -0.801 | -0.443 | -0.354 | -0.268 | -0.536 | -0.383 |
| CGN      | E      | -0.105 | -0.417 | -0.304 | -0.099 | -0.427 | -0.563 | -0.416 | -0.228 | -0.179 | -0.235 | -0.592 |
| CLDN4    | E      | -0.061 | -0.444 | -0.187 | -0.150 | -0.524 | -0.471 | -0.246 | -0.294 | -0.174 | 0.249  | -0.258 |
| CMTM3    | M      | 0.624  | 0.548  | 0.828  | 0.728  | 0.807  | 0.599  | 0.605  | 0.621  | 0.584  | 0.881  | 0.488  |
| CNOT1    | E      | -0.033 | -0.104 | -0.231 | -0.429 | -0.262 | -0.275 | -0.226 | -0.159 | -0.215 | -0.574 | -0.307 |
| CNRIP1   | M      | 0.785  | 0.772  | 0.809  | 0.701  | 0.823  | 0.520  | 0.726  | 0.733  | 0.810  | 0.869  | 0.658  |
| COL10A1  | M      | 0.728  | 0.660  | 0.724  | 0.793  | 0.758  | 0.660  | 0.549  | 0.836  | 0.770  | 0.819  | 0.469  |
| COL1A1   | M      | 0.855  | 0.779  | 0.861  | 0.834  | 0.878  | 0.855  | 0.666  | 0.803  | 0.856  | 0.888  | 0.782  |
| COL1A2   | M      | 0.843  | 0.812  | 0.866  | 0.916  | 0.880  | 0.837  | 0.724  | 0.844  | 0.780  | 0.913  | 0.657  |
| COL3A1   | M      | 0.832  | 0.803  | 0.851  | 0.814  | 0.881  | 0.825  | 0.756  | 0.831  | 0.872  | 0.920  | 0.668  |
| COL5A1   | M      | 0.817  | 0.777  | 0.846  | 0.837  | 0.859  | 0.876  | 0.678  | 0.825  | 0.875  | 0.866  | 0.819  |
| COL5A2   | M      | 0.814  | 0.836  | 0.849  | 0.800  | 0.859  | 0.798  | 0.748  | 0.856  | 0.875  | 0.863  | 0.739  |
| COL6A1   | M      | 0.697  | 0.769  | 0.820  | 0.828  | 0.874  | 0.790  | 0.710  | 0.752  | 0.730  | 0.910  | 0.564  |
| COL6A2   | M      | 0.669  | 0.784  | 0.840  | 0.802  | 0.884  | 0.807  | 0.730  | 0.819  | 0.847  | 0.914  | 0.709  |
| COL6A3   | M      | 0.833  | 0.815  | 0.822  | 0.888  | 0.856  | 0.830  | 0.652  | 0.793  | 0.844  | 0.863  | 0.770  |
| COL8A1   | M      | 0.465  | 0.737  | 0.730  | 0.825  | 0.773  | 0.409  | 0.387  | 0.755  | 0.753  | 0.929  | 0.574  |
| CTNND1   | E      | -0.035 | -0.370 | -0.146 | -0.229 | -0.519 | -0.306 | -0.346 | -0.192 | -0.129 | -0.296 | -0.349 |
| DACT1    | M      | 0.818  | 0.753  | 0.850  | 0.564  | 0.839  | 0.595  | 0.760  | 0.863  | 0.686  | 0.341  | 0.671  |
| DYNC11L2 | E      | 0.030  | -0.194 | -0.078 | -0.098 | 0.095  | -0.005 | -0.296 | 0.004  | -0.163 | -0.450 | -0.088 |
| EMP3     | M      | 0.515  | 0.786  | 0.760  | 0.839  | 0.587  | 0.422  | 0.625  | 0.717  | 0.585  | 0.939  | 0.647  |
| ERBB3    | E      | -0.379 | -0.600 | -0.289 | -0.294 | -0.612 | -0.536 | -0.602 | -0.391 | -0.348 | -0.167 | -0.452 |
| ESRP1    | E      | -0.293 | -0.503 | -0.324 | -0.356 | -0.429 | 0.071  | -0.421 | -0.477 | -0.016 | -0.287 | -0.307 |
| ESRP2    | E      | -0.288 | -0.599 | -0.382 | -0.334 | -0.567 | -0.304 | -0.639 | -0.444 | -0.324 | -0.272 | -0.279 |
| F11R     | E      | -0.252 | -0.334 | -0.166 | -0.338 | -0.459 | -0.357 | -0.481 | -0.382 | -0.212 | -0.550 | -0.299 |
| FAP      | M      | 0.839  | 0.798  | 0.830  | 0.825  | 0.843  | 0.847  | 0.731  | 0.847  | 0.855  | 0.777  | 0.618  |
| FBN1     | M      | 0.793  | 0.862  | 0.827  | 0.886  | 0.820  | 0.687  | 0.704  | 0.846  | 0.864  | 0.936  | 0.736  |
| FN1      | M      | 0.664  | 0.820  | 0.728  | 0.691  | 0.837  | 0.691  | 0.659  | 0.805  | 0.830  | 0.742  | 0.581  |
| FSTL1    | M      | 0.758  | 0.815  | 0.876  | 0.677  | 0.846  | 0.451  | 0.759  | 0.618  | 0.683  | 0.876  | 0.444  |

|                 |          |        |        |        |        |        |        |        |        |        |        |        |
|-----------------|----------|--------|--------|--------|--------|--------|--------|--------|--------|--------|--------|--------|
| <b>GALNT3</b>   | <b>E</b> | -0.017 | -0.173 | -0.088 | -0.191 | -0.274 | -0.083 | -0.081 | -0.362 | -0.225 | -0.290 | -0.536 |
| <b>GPC6</b>     | <b>M</b> | 0.564  | 0.797  | 0.652  | 0.715  | 0.781  | 0.084  | 0.720  | 0.804  | 0.501  | 0.816  | 0.394  |
| <b>GPR56</b>    | <b>E</b> | -0.163 | -0.325 | -0.237 | -0.145 | -0.012 | -0.107 | -0.255 | -0.252 | -0.081 | 0.029  | 0.015  |
| <b>GRHL2</b>    | <b>E</b> | -0.082 | -0.494 | -0.379 | -0.275 | -0.381 | 0.093  | -0.527 | -0.470 | -0.142 | -0.222 | -0.314 |
| <b>GYPC</b>     | <b>M</b> | 0.407  | 0.785  | 0.663  | 0.724  | 0.668  | 0.220  | 0.625  | 0.585  | 0.514  | 0.914  | 0.629  |
| <b>HOOK1</b>    | <b>E</b> | -0.365 | -0.253 | -0.378 | -0.205 | -0.441 | -0.570 | -0.354 | -0.245 | -0.402 | -0.475 | -0.373 |
| <b>HTRA1</b>    | <b>M</b> | 0.782  | 0.697  | 0.853  | 0.805  | 0.587  | 0.697  | 0.702  | 0.710  | 0.604  | 0.773  | 0.642  |
| <b>INHBA</b>    | <b>M</b> | 0.572  | 0.589  | 0.657  | 0.815  | 0.476  | 0.683  | 0.683  | 0.798  | 0.817  | 0.820  | 0.686  |
| <b>IRF6</b>     | <b>E</b> | -0.194 | -0.218 | -0.126 | -0.264 | -0.345 | -0.542 | -0.298 | 0.027  | -0.362 | -0.303 | -0.295 |
| <b>ITGA11</b>   | <b>M</b> | 0.759  | 0.648  | 0.717  | 0.733  | 0.781  | 0.694  | 0.629  | 0.794  | 0.842  | 0.905  | 0.778  |
| <b>LOXL2</b>    | <b>M</b> | 0.543  | 0.754  | 0.767  | 0.822  | 0.731  | 0.710  | 0.652  | 0.787  | 0.756  | 0.872  | 0.629  |
| <b>LRRC15</b>   | <b>M</b> | 0.720  | 0.719  | 0.774  | 0.688  | 0.768  | 0.599  | 0.690  | 0.802  | 0.781  | 0.865  | 0.509  |
| <b>MAP7</b>     | <b>E</b> | -0.112 | -0.601 | -0.398 | -0.246 | -0.454 | -0.613 | -0.445 | -0.407 | -0.254 | -0.436 | -0.488 |
| <b>MARVELD2</b> | <b>E</b> | -0.228 | -0.476 | -0.397 | -0.297 | -0.490 | -0.524 | -0.554 | -0.186 | -0.374 | -0.480 | -0.429 |
| <b>MARVELD3</b> | <b>E</b> | -0.093 | -0.425 | -0.352 | -0.184 | -0.256 | -0.594 | -0.501 | -0.305 | -0.276 | -0.471 | -0.292 |
| <b>MMP2</b>     | <b>M</b> | 0.820  | 0.687  | 0.876  | 0.867  | 0.812  | 0.700  | 0.688  | 0.853  | 0.868  | 0.945  | 0.694  |
| <b>MSRB3</b>    | <b>M</b> | 0.642  | 0.807  | 0.772  | 0.743  | 0.822  | 0.602  | 0.681  | 0.713  | 0.759  | 0.841  | 0.696  |
| <b>MYO5B</b>    | <b>E</b> | -0.206 | -0.405 | -0.207 | -0.098 | -0.481 | -0.615 | -0.273 | -0.259 | -0.082 | -0.284 | -0.232 |
| <b>NAP1L3</b>   | <b>M</b> | 0.661  | 0.623  | 0.756  | 0.626  | 0.734  | 0.358  | 0.580  | 0.623  | 0.339  | 0.863  | 0.445  |
| <b>NID2</b>     | <b>M</b> | 0.814  | 0.768  | 0.795  | 0.702  | 0.865  | 0.532  | 0.741  | 0.844  | 0.693  | 0.719  | 0.652  |
| <b>OCLN</b>     | <b>E</b> | -0.089 | -0.442 | -0.270 | -0.075 | -0.429 | -0.537 | -0.448 | -0.179 | -0.206 | -0.279 | -0.548 |
| <b>OLFML2B</b>  | <b>M</b> | 0.772  | 0.802  | 0.843  | 0.869  | 0.886  | 0.844  | 0.829  | 0.811  | 0.818  | 0.915  | 0.677  |
| <b>PCOLCE</b>   | <b>M</b> | 0.817  | 0.793  | 0.865  | 0.824  | 0.891  | 0.820  | 0.738  | 0.840  | 0.829  | 0.956  | 0.630  |
| <b>PDGFRB</b>   | <b>M</b> | 0.818  | 0.807  | 0.789  | 0.848  | 0.857  | 0.607  | 0.594  | 0.834  | 0.796  | 0.918  | 0.769  |
| <b>PMP22</b>    | <b>M</b> | 0.543  | 0.594  | 0.519  | 0.812  | 0.843  | 0.450  | 0.705  | 0.816  | 0.805  | 0.847  | 0.676  |
| <b>POSTN</b>    | <b>M</b> | 0.734  | 0.750  | 0.741  | 0.647  | 0.865  | 0.727  | 0.778  | 0.843  | 0.812  | 0.806  | 0.407  |
| <b>PRSS8</b>    | <b>E</b> | -0.255 | -0.188 | -0.194 | -0.305 | -0.464 | -0.488 | -0.455 | -0.144 | -0.071 | -0.023 | -0.177 |
| <b>SPARC</b>    | <b>M</b> | 0.811  | 0.807  | 0.876  | 0.880  | 0.871  | 0.622  | 0.816  | 0.878  | 0.876  | 0.959  | 0.733  |
| <b>SPINT1</b>   | <b>E</b> | -0.299 | -0.420 | -0.273 | -0.099 | -0.488 | -0.472 | -0.360 | -0.329 | -0.011 | -0.157 | -0.189 |
| <b>SPOCK1</b>   | <b>M</b> | 0.604  | 0.477  | 0.696  | 0.864  | 0.627  | 0.355  | 0.635  | 0.320  | 0.551  | 0.841  | 0.624  |
| <b>SULF1</b>    | <b>M</b> | 0.740  | 0.748  | 0.596  | 0.807  | 0.784  | 0.701  | 0.719  | 0.781  | 0.598  | 0.869  | 0.633  |
| <b>SYT11</b>    | <b>M</b> | 0.508  | 0.720  | 0.658  | 0.778  | 0.713  | 0.293  | 0.630  | 0.461  | 0.130  | 0.869  | 0.326  |
| <b>THBS2</b>    | <b>M</b> | 0.748  | 0.600  | 0.836  | 0.902  | 0.703  | 0.702  | 0.756  | 0.857  | 0.869  | 0.930  | 0.737  |
| <b>VCAN</b>     | <b>M</b> | 0.696  | 0.688  | 0.809  | 0.810  | 0.848  | 0.414  | 0.715  | 0.798  | 0.887  | 0.891  | 0.476  |
| <b>VIM</b>      | <b>M</b> | 0.426  | 0.836  | 0.857  | 0.909  | 0.834  | 0.503  | 0.645  | 0.802  | 0.557  | 0.947  | 0.310  |
| <b>ZEB2</b>     | <b>M</b> | 0.619  | 0.866  | 0.664  | 0.705  | 0.786  | 0.481  | 0.553  | 0.704  | 0.670  | 0.752  | 0.514  |

**Supplementary Table S3: Cell line acronyms**

| <b>Tumor type</b>                     | <b>Acronym</b> |
|---------------------------------------|----------------|
| Acute myeloid leukemia                | AML            |
| Bladder Urothelial Carcinoma          | BLCA           |
| Glioblastoma multiforme               | GB             |
| Breast invasive carcinoma             | BRCA           |
| Colon adenocarcinoma                  | COAD           |
| Diffuse large B cell lymphoma         | DLBC           |
| Esophageal carcinoma                  | ESCA           |
| Head and Neck squamous cell carcinoma | HNSC           |
| Kidney renal cell carcinoma           | KRCC           |
| Liver hepatocellular carcinoma        | LIHC           |
| Ovarian carcinoma                     | OVCA           |
| Pancreatic adenocarcinoma             | PAAD           |
| Bone Sarcoma                          | BSARC          |
| Soft tissue sarcoma                   | STS            |
| Skin Cutaneous Melanoma               | SCM            |
| Stomach adenocarcinoma                | STAD           |
| Uterine Corpus Endometrial Carcinoma  | UCEC           |
| Neuroblastoma                         | NB             |
